# Supplementary material
Source: PubMed Central journal article supplement (PMC6339578)
Supplement: NIHMS1512140-supplement-1.pdf [file NIHMS1512140-supplement-1.pdf]

## Supplementary Information

### *Non-canonical CTD-kinases regulate RNA polymerase II in a gene-class specific manner*

Corey M. Nemeč<sup>1</sup>, Amit K. Singh<sup>2</sup>, Asfa Ali<sup>1</sup>, Sandra C. Tseng<sup>1</sup>, Kirtimaan Syal<sup>1</sup>, Kennedy J. Ringelberg<sup>1</sup>, Yi-Hsuan Ho<sup>3</sup>, Corinna Hintermair<sup>4</sup>, Mohammad Faiz Ahmad<sup>1</sup>, Rajesh Kumar Kar<sup>1</sup>, Audrey P. Gasch<sup>3</sup>, Md. Sohail Akhtar<sup>2,5</sup>, Dirk Eick<sup>4</sup>, and Aseem Z. Ansari<sup>1,\*</sup>

<sup>1</sup>Department of Biochemistry, University of Wisconsin–Madison, Madison, WI 53706, USA.

<sup>2</sup>Molecular and Structural Biology Division, CSIR-Central Drug Research Institute, Sector 10, Jankipuram Extension, Lucknow, INDIA, PIN 226 03.

<sup>3</sup>Laboratory of Genetics, University of Wisconsin–Madison, Madison, WI 53706, USA.

<sup>4</sup>Department of Molecular Epigenetics, Helmholtz Center Munich, Center of Integrated Protein Science, Munich, Germany.

<sup>5</sup>Academy of Scientific and Innovative Research, CSIR-Central Drug Research Institute, Sector 10, Jankipuram Extension, Lucknow, INDIA, PIN 226 031.

\* Correspondence to:

Professor Aseem Z. Ansari  
University of Wisconsin–Madison  
433 Babcock Drive, Room 315C  
Madison, WI 53706

Email: [azansari@wisc.edu](mailto:azansari@wisc.edu)

Telephone: (608) 265-4690

## Supplementary Tables

**Supplementary Table 1.** Comparison of snoRNA 3'- extension indices between *hrr25is*, *hrr25as*, T4A<sup>1</sup>, *paf1Δ*<sup>2</sup>, Nrd1 anchor away<sup>3</sup>, *rrp6Δ*<sup>4</sup>, and T4V<sup>5</sup>. Data missing from the chart were not included in the original manuscript.

|        | <i>hrr25is</i> | <i>hrr25as</i> | T4A   | <i>paf1Δ</i> | Nrd1AA | <i>rrp6Δ</i> | T4V  | <i>Bur1is</i> |
|--------|----------------|----------------|-------|--------------|--------|--------------|------|---------------|
| SNR3   | 37.50          | 10.32          | 1.75  | 1.47         | 11.94  | 31.76        | 0.60 | 0.92          |
| SNR71  | 22.76          | 0.83           | 14.76 | 6.28         | 15.19  | 7.18         | 1.40 | 0.80          |
| SNR48  | 21.85          | 1.17           | 7.26  | 8.60         | 13.17  | 2.81         | 1.08 | 1.00          |
| SNR56  | 20.62          | 1.64           | 2.31  | 2.13         | 18.01  | 0.95         | 0.59 | 0.86          |
| SNR9   | 19.42          | 8.38           | 2.04  | 1.63         |        | 7.10         | 0.99 | 0.76          |
| SNR45  | 19.17          | 2.01           | 1.18  | 4.31         | 18.55  | 19.03        | 0.67 | 1.10          |
| SNR47  | 19.07          | 1.66           | 20.56 | 2.33         | 22.94  | 1.75         | 1.32 | 1.02          |
| SNR64  | 18.82          | 1.62           | 7.32  | 3.06         | 12.83  | 1.50         | 1.32 | 1.33          |
| SNR34  | 17.42          | 8.79           | 2.24  | 1.72         | 23.42  | 5.99         | 0.98 | 0.74          |
| SNR82  | 17.41          | 5.83           | 10.11 | 1.73         | 12.87  | 4.60         | 0.89 | 1.17          |
| SNR66  | 14.63          | 1.97           | 2.06  | 0.66         | 11.34  | 2.07         | 0.99 | 0.99          |
| SNR32  | 14.49          | 8.88           | 1.44  | 2.89         | 17.04  | 5.64         | 0.88 | 0.70          |
| SNR60  | 14.25          | 1.75           | 6.02  | 3.86         | 17.11  | 5.96         | 1.31 | 0.94          |
| SNR5   | 14.19          | 4.88           | 16.24 | 1.90         | 9.74   | 6.81         | 0.84 | 0.80          |
| SNR11  | 14.17          | 2.47           | 1.71  | 0.95         |        | 17.98        | 0.59 | 0.87          |
| SNR37  | 12.85          | 1.24           | 0.85  | 0.56         | 8.48   | 38.40        | 0.93 | 0.89          |
| SNR128 | 12.27          | 1.86           | 0.96  | 0.88         | 12.18  | 2.90         | 0.86 | 0.93          |
| SNR10  | 11.75          | 3.72           | 0.92  | 0.75         | 15.59  | 0.88         | 0.83 | 0.78          |
| SNR49  | 11.17          | 2.66           | 4.92  | 0.96         | 17.44  | 6.84         | 0.98 | 0.88          |
| SNR68  | 9.72           | 1.46           | 4.55  | 2.35         |        | 2.70         | 0.99 | 1.10          |
| SNR8   | 9.35           | 2.09           | 1.89  | 1.16         | 12.71  | 5.03         | 0.92 | 0.39          |
| SNR46  | 8.72           | 4.14           | 2.03  | 0.86         | 15.42  | 7.65         | 1.07 | 1.16          |
| SNR35  | 8.54           | 1.63           | 1.31  | 1.28         | 16.58  | 20.68        | 0.62 | 0.95          |
| SNR67  | 8.01           | 1.10           | 0.64  | 0.31         | 7.70   | 2.19         | 0.69 | 0.69          |
| SNR61  | 7.99           | 1.64           | 1.05  | 0.40         | 12.82  | 6.90         | 0.70 | 0.74          |
| SNR13  | 7.79           | 1.15           | 18.57 | 1.12         | 17.26  | 8.20         | 0.65 | 0.78          |
| SNR62  | 7.71           | 1.39           | 0.70  | 1.04         | 15.68  | 8.82         | 0.80 | 0.90          |
| SNR80  | 7.56           | 4.89           | 0.56  | 0.44         |        | 3.62         | 0.56 | 0.76          |
| SNR4   | 7.27           | 4.52           | 2.21  | 0.98         | 18.12  | 1.07         | 0.85 | 0.94          |
| SNR39B | 6.95           | 1.11           | 1.62  | 1.47         | 9.13   | 1.73         | 0.70 | 1.09          |
| SNR83  | 6.72           | 1.57           | 1.26  | 1.25         | 12.65  | 3.23         | 0.58 | 0.83          |
| SNR79  | 6.36           | 3.44           | 3.04  | 2.83         | 12.03  | 1.90         | 0.75 | 1.09          |
| SNR31  | 6.34           | 3.45           | 0.85  | 0.46         | 12.38  | 11.95        | 0.62 | 1.19          |
| SNR30  | 5.96           | 9.47           | 1.97  | 1.55         | 11.84  | 32.34        | 0.70 | 1.09          |
| SNR42  | 5.53           | 1.22           | 4.83  | 2.29         | 10.65  | 14.64        | 0.95 | 1.11          |
| SNR50  | 5.42           | 1.61           | 3.67  | 1.60         | 7.12   | 1.65         | 0.69 | 0.84          |
| SNR58  | 4.84           | 0.93           | 2.15  | 1.56         | 9.97   | 2.68         | 0.71 | 1.23          |

|        |      |       |       |      |       |       |      |      |
|--------|------|-------|-------|------|-------|-------|------|------|
| SNR63  | 4.78 | 2.02  | 3.42  | 0.70 | 10.36 | 7.76  | 1.30 | 0.86 |
| SNR69  | 4.75 | 1.79  | 4.26  | 1.86 | 11.10 | 3.43  | 0.89 | 0.66 |
| SNR53  | 4.67 | 2.17  | 2.66  | 2.30 | 7.44  | 2.95  | 0.57 | 0.99 |
| SNR33  | 4.60 | 2.53  | 20.55 | 2.18 | 6.64  | 2.27  | 1.03 | 0.68 |
| SNR51  | 3.98 | 1.03  | 6.99  | 2.37 |       | 0.86  | 0.66 | 1.52 |
| SNR189 | 3.85 | 9.62  | 5.29  | 1.56 | 6.87  | 4.93  | 0.91 | 0.97 |
| SNR86  | 3.46 | 3.34  | 0.70  | 1.79 |       | 1.48  | 0.33 | 2.08 |
| SNR40  | 3.38 | 0.99  | 0.78  | 1.47 | 8.48  | 1.20  | 0.60 | 1.04 |
| SNR161 | 3.32 | 1.75  | 7.96  | 4.77 | 7.59  | 3.24  | 1.27 | 1.07 |
| SNR77  | 3.18 | 0.96  | 0.64  | 0.87 |       | 1.72  | 0.68 | 1.06 |
| SNR17A | 2.98 | 1.34  | 0.79  | 1.64 | 5.44  | 1.29  | 0.55 | 1.30 |
| SNR36  | 2.90 | 10.79 | 0.97  | 0.80 | 11.58 | 17.40 | 0.48 | 0.48 |
| SNR81  | 2.86 | 5.78  | 10.42 | 3.75 | 5.86  | 5.96  | 0.67 | 0.70 |
| SNR52  | 2.86 | 1.15  | 0.84  | 1.13 |       | 0.72  | 1.03 | 0.85 |
| SNR54  | 2.78 | 1.02  | 0.77  | 2.12 |       | 0.86  | 1.15 | 0.90 |
| SNR39  | 2.58 | 0.22  | 0.89  | 1.22 |       | 2.50  | 0.76 | 1.31 |
| SNR74  | 2.51 | 1.12  | 0.95  | 0.73 |       | 1.62  | 0.61 | 0.99 |
| SNR43  | 2.31 | 2.70  | 3.76  | 0.65 | 8.94  | 15.03 | 1.47 | 1.18 |
| SNR72  | 1.99 | 0.88  | 1.78  | 0.83 |       | 1.53  | 0.59 | 1.64 |
| SNR191 | 1.73 | 0.79  | 0.92  | 2.79 |       | 1.09  | 0.87 | 0.40 |
| SNR73  | 1.72 | 1.05  | 0.92  | 0.64 |       | 2.17  | 0.66 | 0.69 |
| SNR18  | 1.70 | 0.41  | 0.90  | 1.16 | 2.60  | 1.01  | 0.87 | 1.63 |
| SNR38  | 1.60 | 1.12  | 0.98  | 1.54 |       | 4.17  | 0.68 | 0.54 |
| SNR70  | 1.49 | 2.48  | 1.06  | 1.17 |       | 0.84  | 0.62 | 0.82 |
| SNR59  | 1.42 | 0.45  | 1.91  | 1.03 | 7.97  | 9.84  | 0.91 | 0.91 |
| SNR87  | 1.37 | 1.08  | 1.88  | 0.25 | 8.17  | 1.36  | 1.22 | 0.73 |
| SNR17B | 1.23 | 1.22  | 0.82  | 0.41 |       | 1.25  | 0.63 | 0.78 |
| SNR57  | 1.20 | 0.67  | 0.55  | 0.91 |       | 1.73  | 0.63 | 0.85 |
| SNR78  | 1.20 | 1.08  | 0.91  | 1.29 |       | 1.23  | 0.58 | 2.17 |
| SNR84  | 1.18 | 3.04  | 1.04  | 1.63 |       | 3.48  | 0.67 | 1.52 |
| SNR75  | 1.15 | 1.59  | 0.94  | 0.59 |       | 1.96  | 0.62 | 0.71 |
| SNR76  | 1.07 | 0.83  | 0.88  | 0.86 |       | 2.29  | 0.61 | 0.82 |
| SNR85  | 1.05 | 0.79  | 3.35  | 3.52 | 9.71  |       | 0.81 | 0.79 |
| SNR44  | 1.01 | 0.82  | 1.24  | 0.55 |       | 0.50  | 0.66 | 0.69 |
| SNR65  | 0.76 | 0.29  | 1.08  | 0.82 | 20.01 | 6.14  | 0.64 | 1.04 |
| SNR190 | 0.63 | 1.63  | 0.87  | 1.16 |       | 0.73  | 0.62 | 0.95 |
| SNR41  | 0.62 | 0.86  | 0.93  | 1.26 |       | 0.97  | 0.66 | 0.78 |
| NME1   | 0.31 | 2.95  | 0.65  | 1.09 |       |       | 0.56 | 0.83 |
| SNR24  | 0.21 | 0.52  | 0.97  | 0.66 |       |       | 0.63 | 0.77 |
| SNR55  | 0.08 | 1.77  | 0.70  | 0.99 |       | 1.01  | 0.60 | 1.00 |

**Supplementary Table 2.** Oligonucleotides used in this study.

| <b>Name</b>      | <b>Function</b>   | <b>Sequence (5'-3')</b>                                                |
|------------------|-------------------|------------------------------------------------------------------------|
| Hrr25is<br>F     | SDM<br>I23C       | GTGGTTCCTTTGGTGACTGTTACCACGGCACGAAC                                    |
| Hrr25is<br>R     | SDM<br>I23C       | GTTCGTGCCGTGGTAACAGTCACCAAAGGAACCAC                                    |
| Hrr25<br>WT F    | SDM<br>WT         | GGTGAATATAATGCTATGGTCATCGATCTTCTAGGCCCATCT<br>TTG                      |
| Hrr25<br>WT R    | SDM<br>WT         | CAAAGATGGGCCTAGAAGATCGATGACCATAGCATTATATT<br>CACC                      |
| Hrr25<br>NcoI F  | Hrr25-<br>HA      | TTCTTTGCCATGGCAGGGTTTG                                                 |
| Hrr25<br>NcoI R  | Hrr25-<br>HA      | CAACCAAATTGACTGGCCAGC                                                  |
| Hrr25<br>pFA6a F | Hrr25-<br>HA      | GCTGGCCAGTCAATTTGGTTGcggatccccgggtaattaa                               |
| Hrr25<br>pFA6a R | Hrr25-<br>HA      | CTGATCGACGTcTcaTAAATCATAAGAAATTCG                                      |
| Hrr25Δ<br>F      | Delete<br>Hrr25   | ATGGACTTAAGAGTAGGAAGGAAATTTTCGTATTGGCAGGAA<br>GATTGGGAGGATTGTACTGAGAGT |
| Hrr25Δ<br>R      | Delete<br>Hrr25   | TTACAACCAAATTGACTGGCCAGCTGGTTTATCTTGAGGCGG<br>CTGTTGTGCTGTGCGGTATTTC   |
| SNR47-<br>F      | Northern<br>Probe | TCATGTAAACGCATGGGG                                                     |
| SNR47-<br>R      | Northern<br>Probe | TAATACGACTCACTATAGGAGCTACTCTGATTTACGTTACCG<br>CC                       |
| SNR13-<br>F      | Northern<br>Probe | TTATAAATGGCATCTCAAATCGTC                                               |
| SNR13-<br>R      | Northern<br>Probe | TAATACGACTCACTATAGGCTGTCGCTTCCGTGTCTCTTGTC<br>TG                       |
| SNR40-<br>F      | Northern<br>Probe | AGTACCTTAACACATGACGAAGA                                                |
| SNR40-<br>R      | Northern<br>Probe | TAATACGACTCACTATAGGCTGATCTATTTACGCCCCAGA                               |
| SCR1-F           | Northern<br>Probe | AGGCTGTAATGGCTTTCTGGTGGA                                               |
| SCR1-R           | Northern<br>Probe | TAATACGACTCACTATAGGATATGTGCTATCCCGGCCGCCTC<br>CA                       |
| M3F              | Pma1-1<br>qPCR    | GACGACGAAGACAGTGATAACGAT                                               |
| M3R              | Pma1-1<br>qPCR    | GGACCGACGAAAAACATAACGAAC                                               |
| M5F              | Pma1-2<br>qPCR    | CAACTGATGGTCGTATTGTCCTG                                                |
| M5R              | Pma1-2            | CGAAAGTGTTGTCACCGGTAG                                                  |

|       |                 |                            |
|-------|-----------------|----------------------------|
|       | qPCR            |                            |
| M9F   | Pma1-3<br>qPCR  | GGGCATAGTTTTAGCTATAGGTTC   |
| M9R   | Pma1-3<br>qPCR  | CACCAGCCAATTGCCAGGAT       |
| Y4F   | Pyk1-1<br>qPCR  | GGTAAGCCAGTTATCTGTGCTACC   |
| Y4R   | Pyk1-1<br>qPCR  | GCGGTTTCAGCCATAGTGGTAAC    |
| Y5F   | Pyk1-2<br>qPCR  | AGATGCCCAAGAGCTGCTAGATT    |
| Y5R   | Pyk1-2<br>qPCR  | CCTTGGATGGAAACGTAAGTGTC    |
| Y6F   | Pyk1-3<br>qPCR  | CGATGAGGTGTTGCATTTTTGGAA   |
| Y6R   | Pyk1-3<br>qPCR  | GTACCCATGTATAACCTTCCAAGT   |
| U1P3  | SNR19-1<br>qPCR | GGGGCCTTTCAAAAGAGAGCT      |
| U1RP3 | SNR19-1<br>qPCR | ATCTTCAAACACTACAATCCCGACCA |
| U1FP4 | SNR19-2<br>qPCR | AGAGAGCCGCAACAAGAAACGTAA   |
| U1RP4 | SNR19-2<br>qPCR | AGCTCACATTCTCAACTACCGT     |
| U2FR3 | SNR20-1<br>qPCR | CCCCCAAGTATCGGCCAAAG       |
| U2RP3 | SNR20-1<br>qPCR | AAGAGCTCCTTCTCCTCAATGAG    |
| U2FP4 | SNR20-2<br>qPCR | CACGTACTCACACATGGCCGA      |
| U2RP4 | SNR20-2<br>qPCR | GGAGAGAACGAGAAAGCGGAT      |

**Supplementary Table 3.** Strains used in this study.

| <b>Strain</b>             | <b>Genotype</b>                                                           | <b>Plasmid</b>               | <b>Reference</b>                         |
|---------------------------|---------------------------------------------------------------------------|------------------------------|------------------------------------------|
| TAP library               | MATa his3Δ1 leu2Δ0 met15Δ0 ura3Δ0                                         |                              | Open Biosystems, currently GE Healthcare |
| <i>WT HRR25</i>           | his3Δ leu2Δ ura3Δ Hrr25Δ::kanMX4                                          | pRS316-HRR25                 | E. Hurt Lab                              |
| <i>hrr25as</i>            | his3Δ leu2Δ ura3Δ Hrr25Δ::kanMX4                                          | pRS315-hrr25-I82G            | E. Hurt Lab                              |
| <i>hrr25is</i>            | his3Δ leu2Δ ura3Δ Hrr25Δ::kanMX4                                          | pRS315-hrr25-I82G,I23C       | This study                               |
| <i>WT HRR25-HA</i>        | his3Δ leu2Δ ura3Δ Hrr25Δ::kanMX4                                          | pRS315-hrr25-HA              | This study                               |
| <i>hrr25is-HA</i>         | his3Δ leu2Δ ura3Δ Hrr25Δ::kanMX4                                          | pRS315-hrr25-HA (I82G, I23C) | This study                               |
| <i>pho85as</i>            | MATa pho85as1::HPH his3Δ1 leu2Δ0 ura3Δ0 met15Δ0                           |                              | B. Andrews Lab                           |
| <i>cdc28as</i>            | MATa cdc28as1::NAT his3Δ1 leu2Δ0 ura3Δ0 met15Δ0                           |                              | B. Andrews Lab                           |
| <i>bur1as</i>             | MATa his3Δ1 leu2Δ0 met15Δ0 ura3Δ0 bur1 L149G                              |                              | S. Hahn Lab                              |
| <i>ctk1as</i>             | MATα his3Δ200 leu2-3,112 ura3-52 rpb1Δ187::HIS3 ctk1-F259G-HA3::kan       | RPB1-XTPH LEU2               | A. Greenleaf Lab                         |
| <i>kin28as</i>            | MATα ade2Δ::hisG his3Δ200 leu2Δ0 lys2Δ0 met15Δ0 trp1Δ63 ura3Δ0 kin28 L83G |                              | S. Hahn Lab                              |
| LL20 (HRR25 WT)           | MATα leu2-3,112 his3-11,15                                                |                              | M. Stark Lab                             |
| ARB97 ( <i>hrr25-3</i> )  | MATα leu2-3,112 his3-11,15 hrr25-3/kti4-1                                 |                              | M. Stark Lab                             |
| WT RTT103-TAP             | MATa his3Δ1 leu2Δ0 met15Δ0 ura3Δ0 Rtt103-TAP::His3 Hrr25Δ::URA3           | pRS315-hrr25-HA              | This study                               |
| <i>hrr25is</i> RTT103-TAP | MATa his3Δ1 leu2Δ0 met15Δ0 ura3Δ0 Rtt103-TAP::His3 Hrr25Δ::URA3           | pRS315-hrr25-HA (I82G, I23C) | This study                               |

## Supplementary Figures

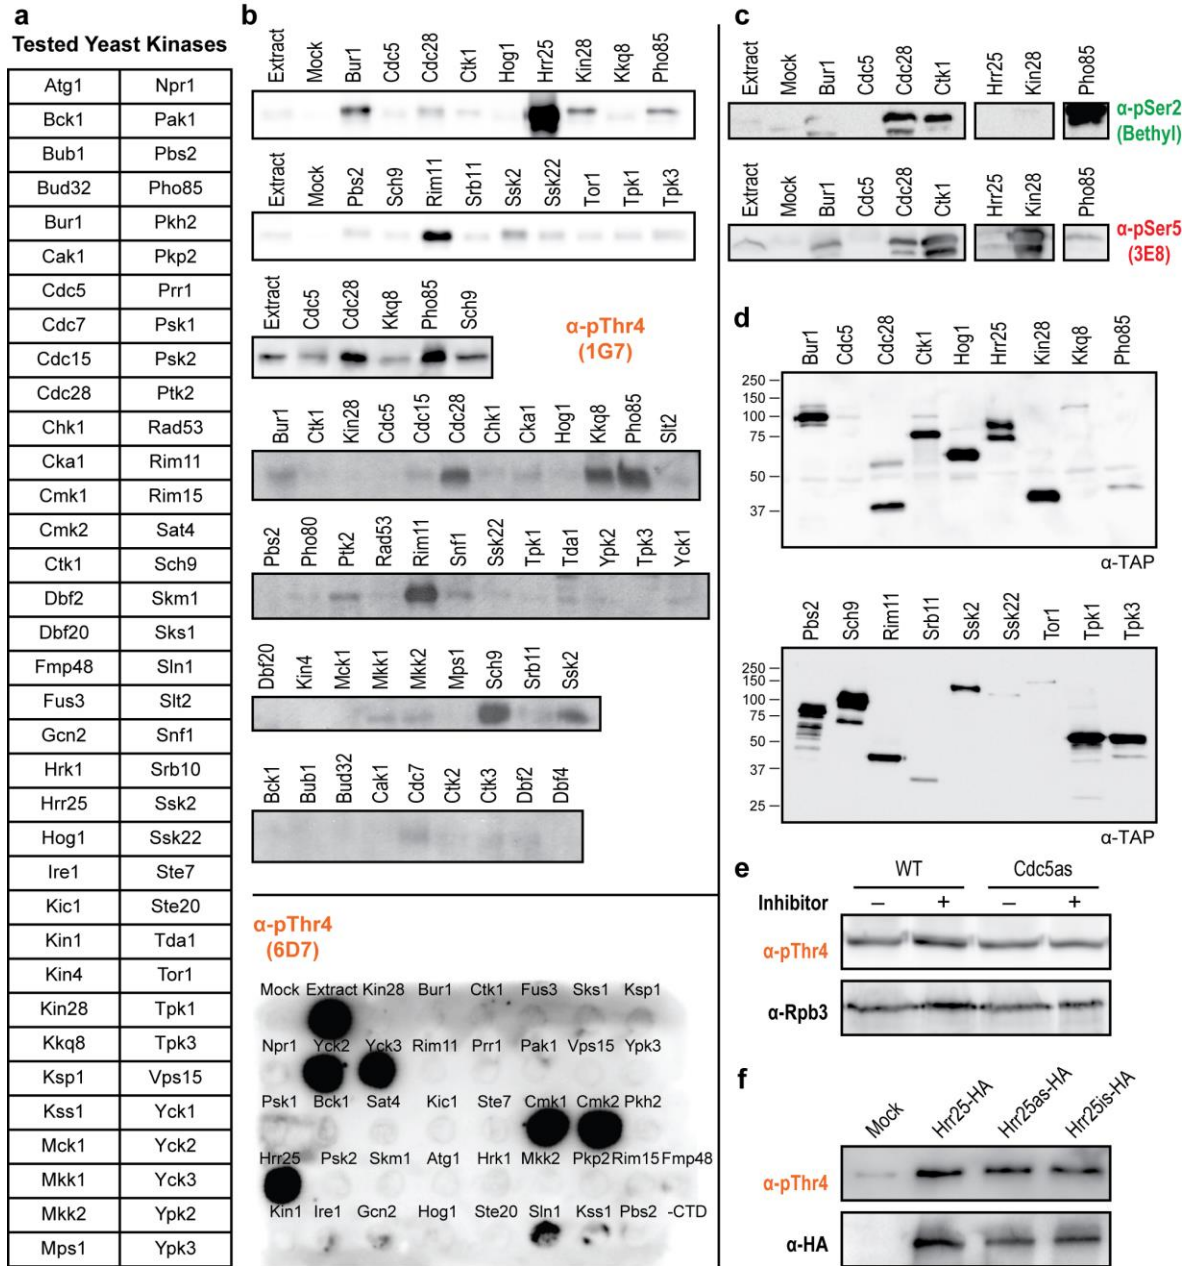

**Supplementary Figure 1 | Additional kinase data.** (a) List of 70 yeast kinases tested. (b) Representative in vitro kinase assays (Western blots or dot blots) probing for pThr4 with the indicated antibodies. (each kinase was tested from at least two independent purifications). Full length blots are shown in Supplementary Fig. 12. (c) Representative in vitro kinase assays probing pSer2 or pSer5, and (d) evidence that kinases have been purified. (e) In vivo inhibition of WT or Cdc5as cells probed with antibodies targeting pThr4 or Rpb3. (n = 2 independent experiments). (f) WT Hrr25, Hrr25as, and Hrr25is were purified via HA tag. An in vitro kinase assay showing the activity of each kinase ( $\alpha$ -pThr4) with respect to total amount of kinase ( $\alpha$ -HA).

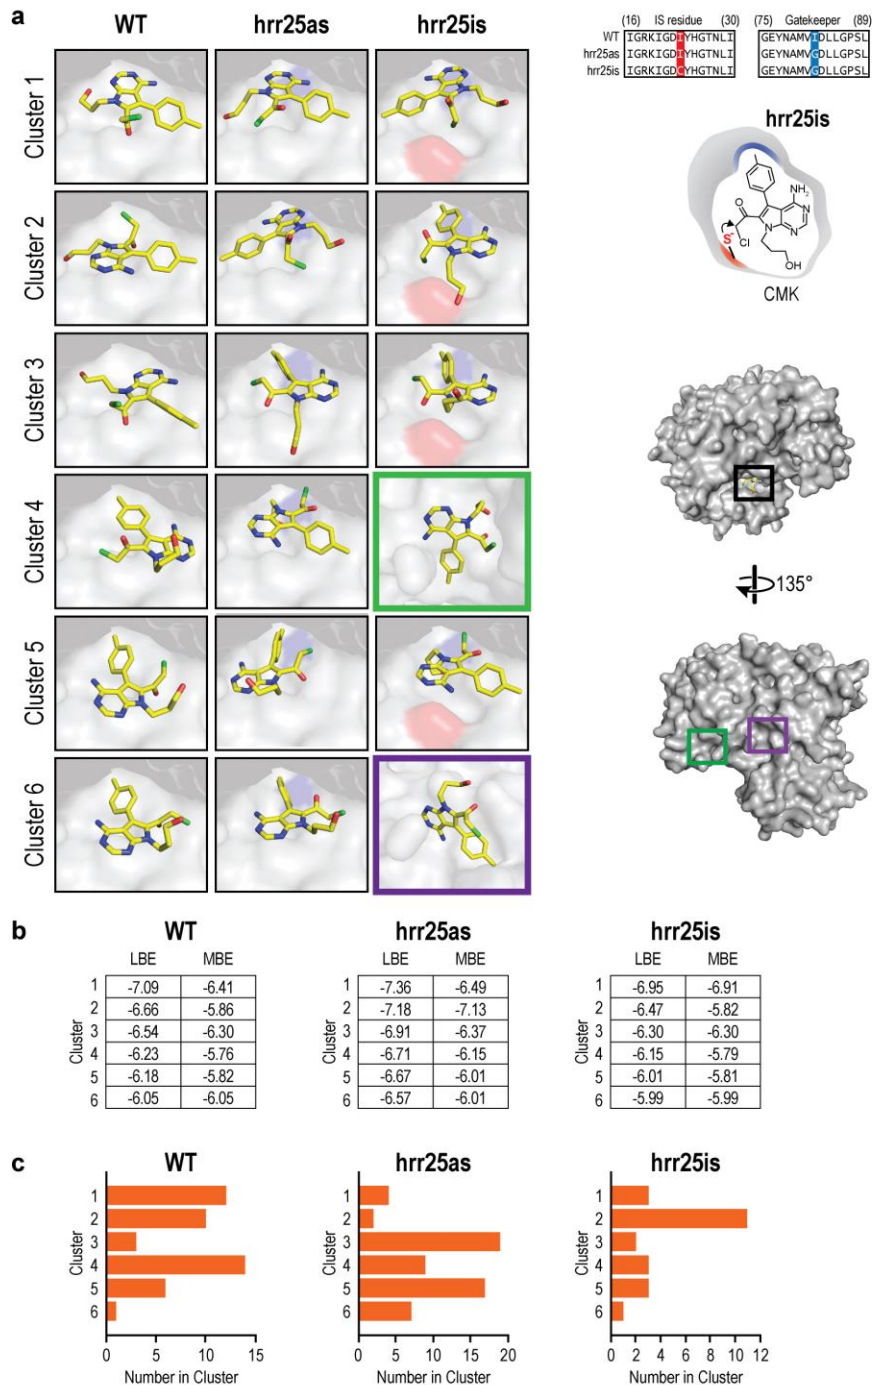

**Supplementary Figure 2 | Docking of CMK into Hrr25.** (a) Substitutions to create hrr25is and a schematic are shown (right). Six clusters of CMK docked into WT, hrr25as, and hrr25is are shown. Structures were clustered if RMSD < 2.0 Å. CMK docked into the active site unless surrounded by a colored box. The location of the docking is shown to the right. (b) Lowest binding energy (LBE) for each cluster and mean binding energy (MBE) for each cluster are shown. (c) The number of structures in each cluster are shown as a histogram. For each structure, 100 models of the inhibitor in the active site were created. Structures were clustered if the RMSD ≤ 2 Å.



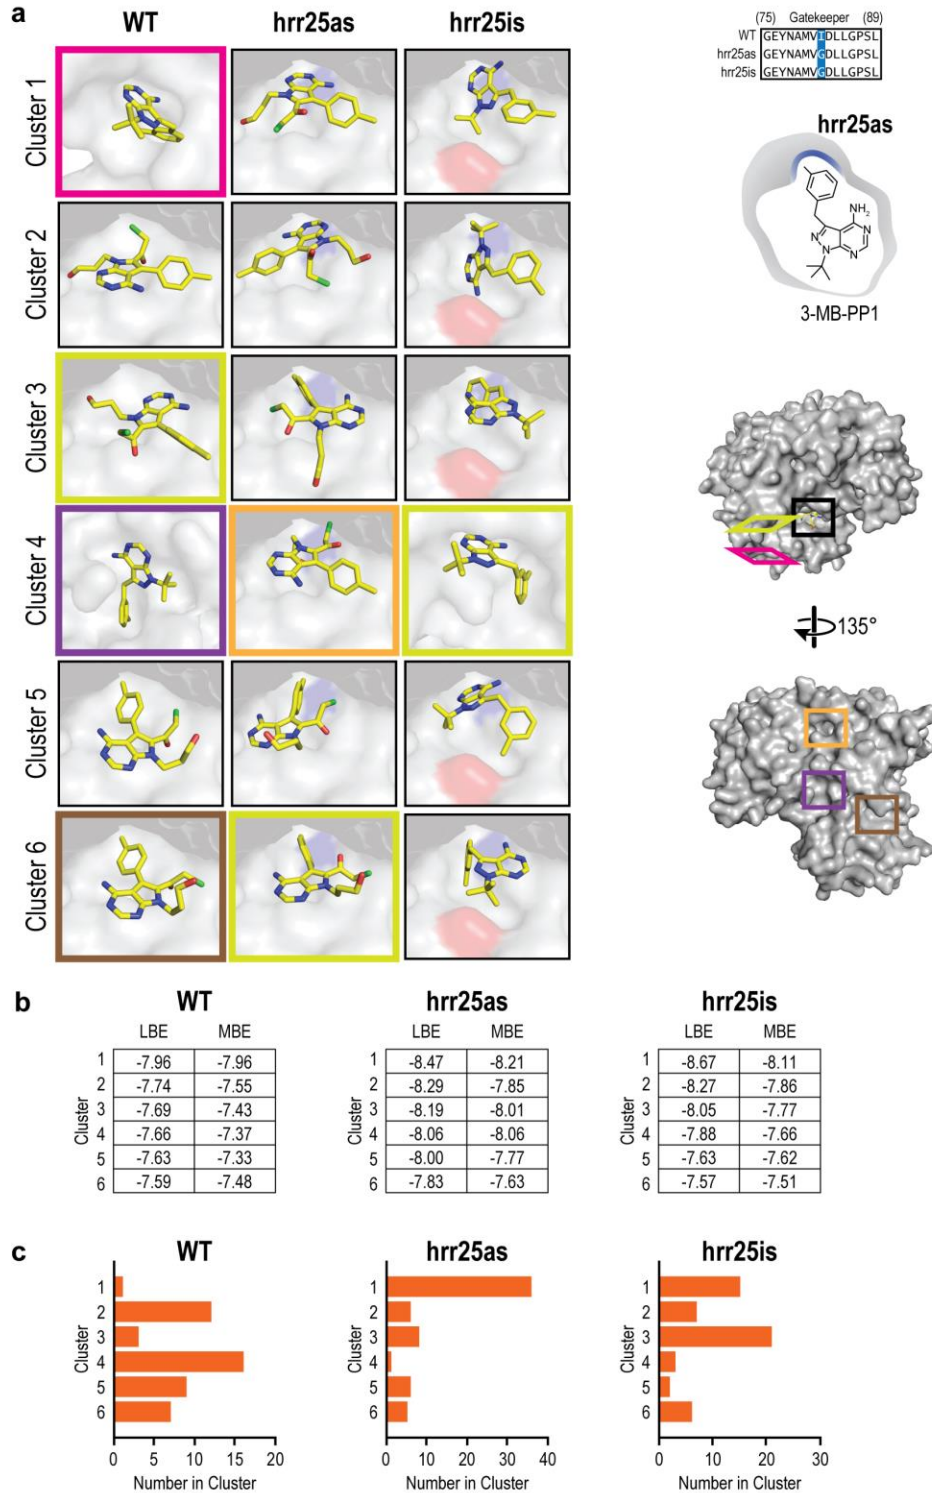

**Supplementary Figure 3 | Docking of 3-MB-PP1 into Hrr25.** (a) Substitutions to create hrr25as and a schematic are shown (right). Six clusters of 3-MB-PP1 docked into WT, hrr25as, and hrr25is are shown. Structures were clustered if RMSD < 2.0 Å. 3-MB-PP1 docked into the active site unless surrounded by a colored box. The location of the docking is shown to the right. (b) Lowest binding energy (LBE) for each cluster and mean binding energy (MBE) for each cluster are shown. (c) The number of structures in each cluster are shown as a histogram.

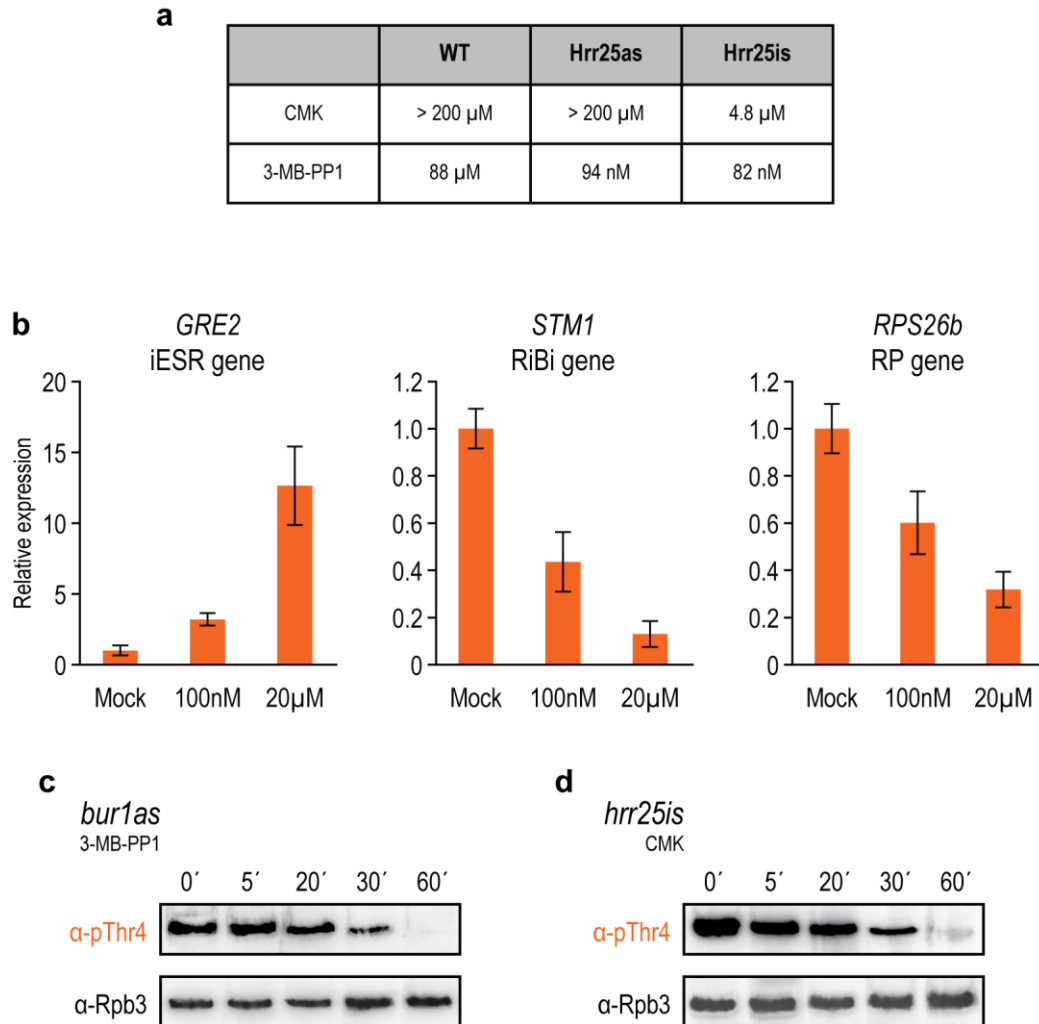

**Supplementary Figure 4 | Additional inhibition data.** (a) WT, Hrr25as, and Hrr25is cells were treated with either CMK or 3-MB-PP1 at concentrations ranging from 20 pM to 200  $\mu$ M. For each concentration, the OD<sub>600</sub> after 16 hours of inhibition is plotted in Fig 3d. IC<sub>50</sub> values were calculated with GraphPad Prism. (b) *hrr25as* was treated with 3-MB-PP1 at the indicated concentrations. The relative expression via qPCR of an induced ESR gene (*GRE2*), ribosome biogenesis gene (*STM1*), and a ribosome protein gene (*RPS26b*) are shown. Error bars are standard error of the mean (n=3 independent experiments). Even when *hrr25as* was treated with 3-MB-PP1 at its IC<sub>50</sub>, signatures of the environmental stress response were evident. (c) *bur1as* was inhibited with 3-MB-PP1 and (d) *hrr25is* was inhibited with CMK for the indicated times, lysed, and analyzed via western blot probing pThr4 (1G7) or Rpb3 as a loading control. (n = 3 independent experiments). Full length blots are shown in Supplementary Fig. 12.

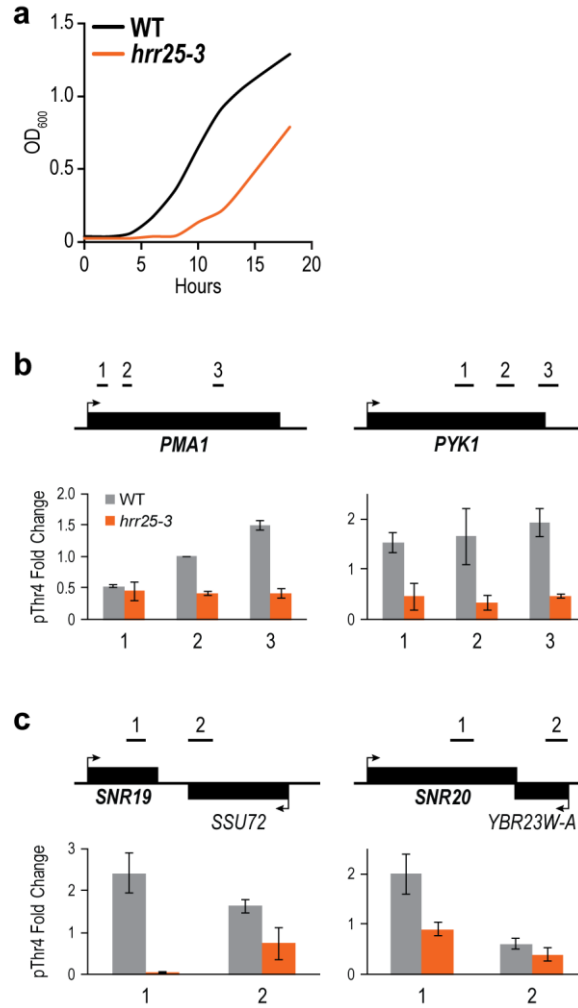

**Supplementary Figure 5 | Defects in *hrr25-3* cells mirror Hrr25 inhibition.** (a) Growth curves of WT (black) or *hrr25-3* (orange) cells (left). (b,c) ChIP qPCR of pThr4 marks at representative (b) protein coding genes or (c) noncoding genes. Locations of amplicons are shown and numbered. ChIP in WT (grey) or *hrr25-3* (orange) cells are shown. Error bars are standard deviation (n=3).

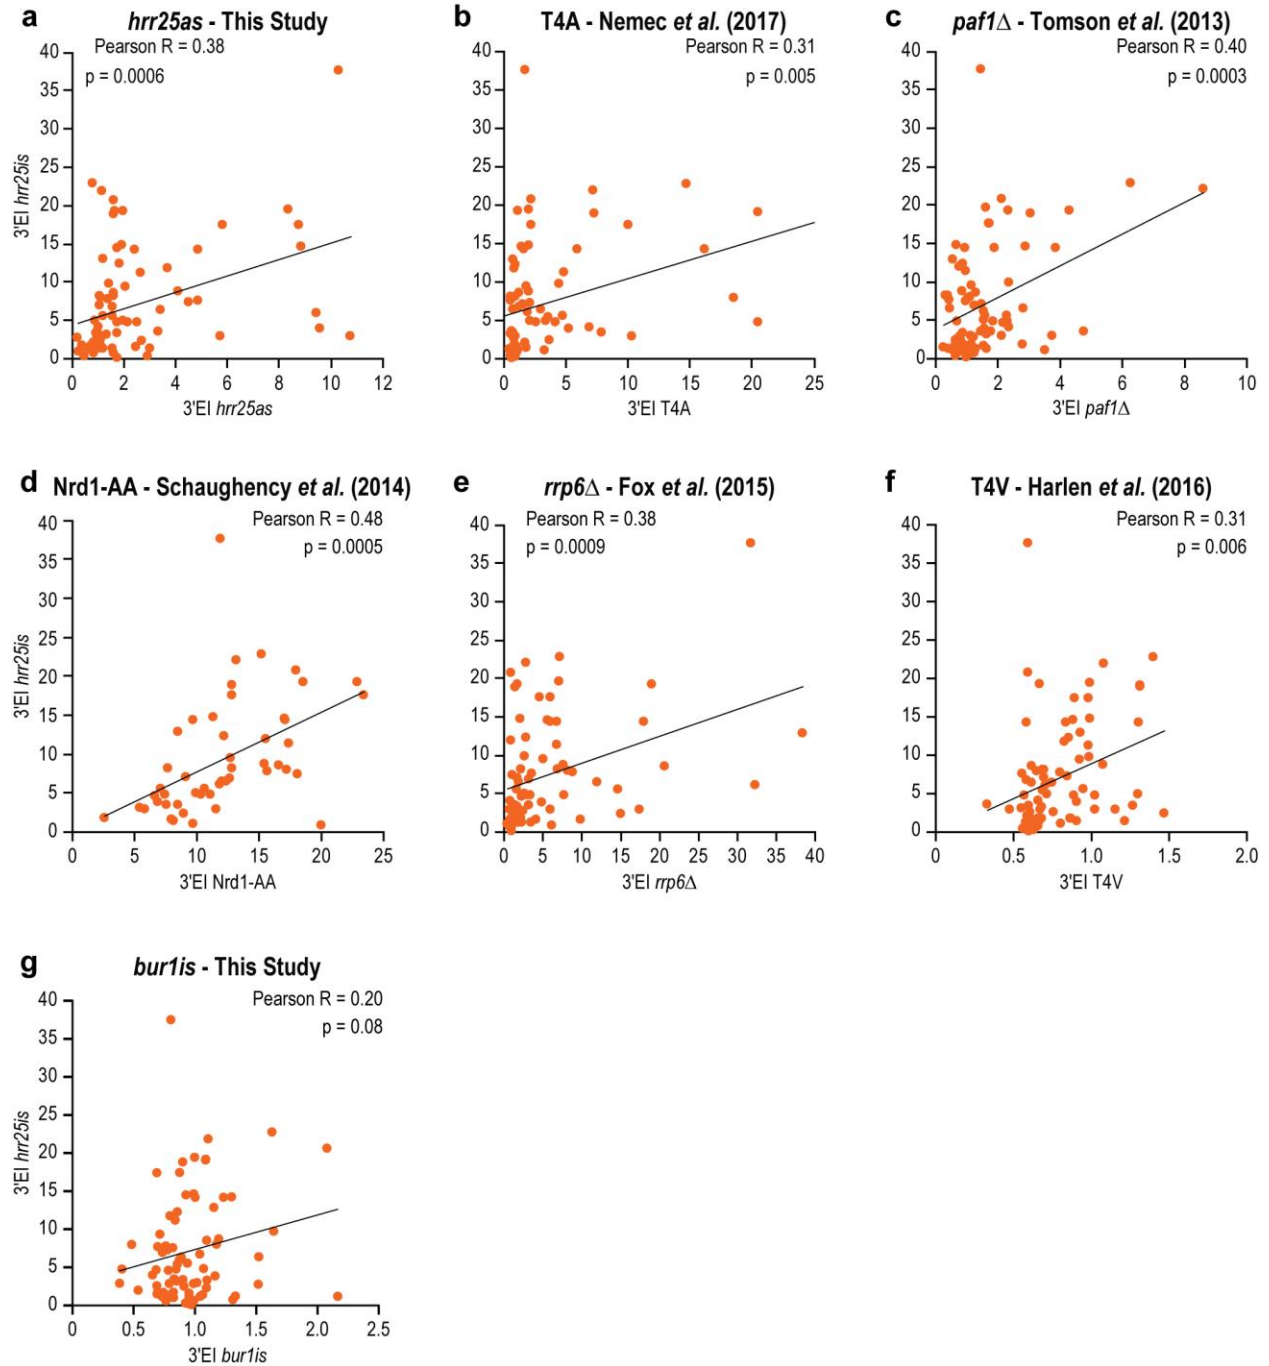

**Supplementary Figure 6 | Comparison of 3'-extension indices to other datasets.** Comparison of readthrough in *hrr25is* to (a) *hrr25as* (b) T4A<sup>1</sup>, (c) *paf1* $\Delta$ <sup>2</sup>, (d) Nrd1 anchor away<sup>3</sup>, (e) *rrp6* $\Delta$ <sup>4</sup>, (f) T4V<sup>5</sup>, or (g) *bur1is*.

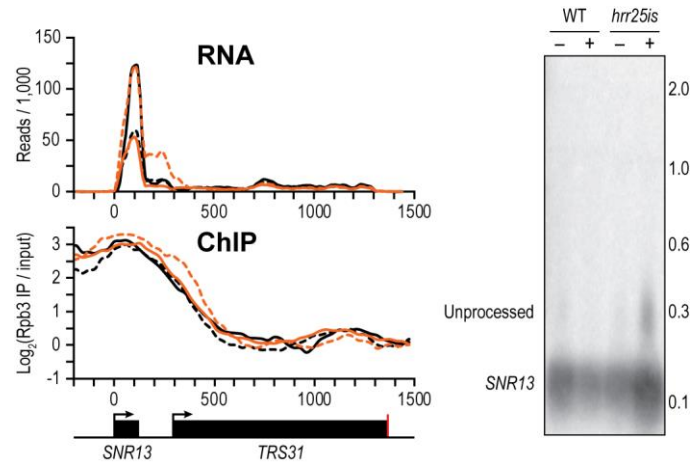

**Supplementary Figure 7 | Additional evidence of readthrough in *hrr25is*.** RNA-seq from WT (black) or *hrr25is* (orange) cells treated with either DMSO (solid) or CMK (dotted) are shown at *SNR13* (top). Rpb3 ChIP (bottom) in the same strains is shown at the same locus. A Northern blot probing for *SNR13* is shown (right). (n = 2 independent experiments). Full length blots are shown in Supplementary Fig. 12.

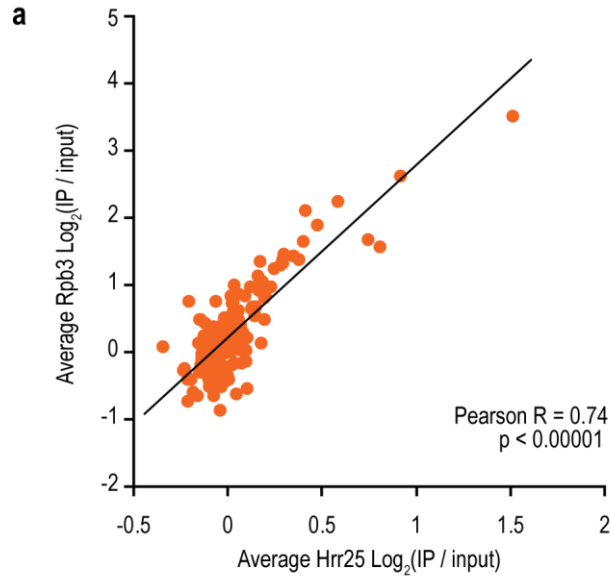

**b** GO Biological Process

|           |                                                                                                                                                                           |                                                                       |
|-----------|---------------------------------------------------------------------------------------------------------------------------------------------------------------------------|-----------------------------------------------------------------------|
| Cluster 1 | Transcription, DNA-dependent                                                                                                                                              | p=3.3e-5                                                              |
| Cluster 2 | DNA repair<br>Response to DNA damage stimulus                                                                                                                             | p=1.2e-5<br>p=5.8e-5                                                  |
| Cluster 3 | Protein transport                                                                                                                                                         | p=4.2e-5                                                              |
| Cluster 4 | Protein folding<br>Ribosome biogenesis<br>SRP-dependent cotranslational protein target to membrane                                                                        | p=1.8e-5<br>p=6.7e-5<br>p=7.2e-5                                      |
| Cluster 5 | Translation<br>Ribosome biogenesis<br>Maturation of SSU-rRNA from tricistronic rRNA transcript<br>rRNA processing<br>rRNA export from nucleus<br>Translational elongation | p<1e-14<br>p=4.1e-12<br>p=2.6e-11<br>p=3.3e-9<br>p=4.7e-8<br>p=6.2e-8 |

**Supplementary Figure 8 | Hrr25 profiles correlate with Pol II at protein coding genes. (a)** Scatterplot of average Rpb3 (y-axis) or Hrr25 (x-axis) ChIP signal across each protein coding gene. Pearson R and p-value are shown. **(b)** GO annotations ChIP clusters from Fig. 5a.

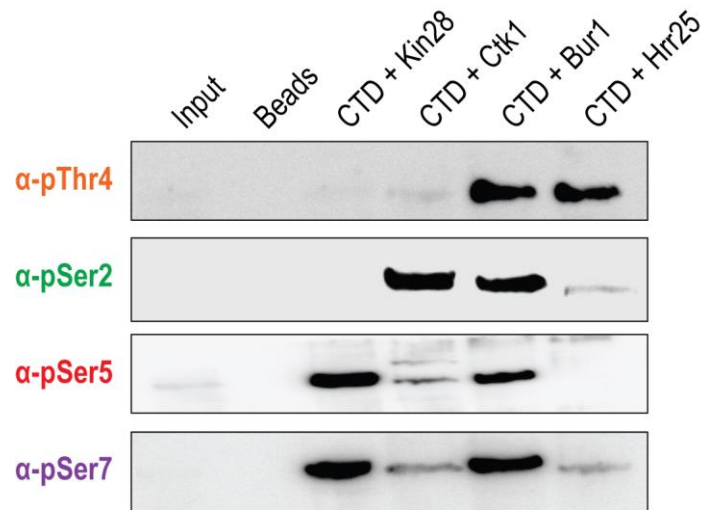

**Supplementary Figure 9 | Confirmation of CTD phosphorylation.** Bead-bound GST-CTD was incubated with Kin28, Ctk1, Bur1, or Hrr25 to phosphorylate the CTD at various positions. Blots were probed with antibodies targeting pThr4 (1G7), pSer2 (Bethyl), pSer5 (3E8), or pSer7 (4E12). “Beads” refers to sepharose beads lacking bound CTD (negative control). Input refers to Rtt103, loaded at 10% the abundance of Rtt103 incubated with CTD as in Fig. 6. (n = 2 independent experiments).

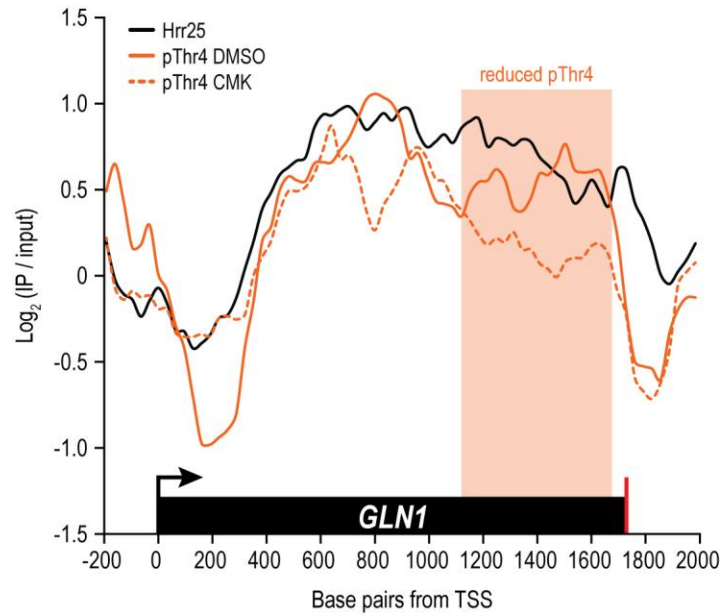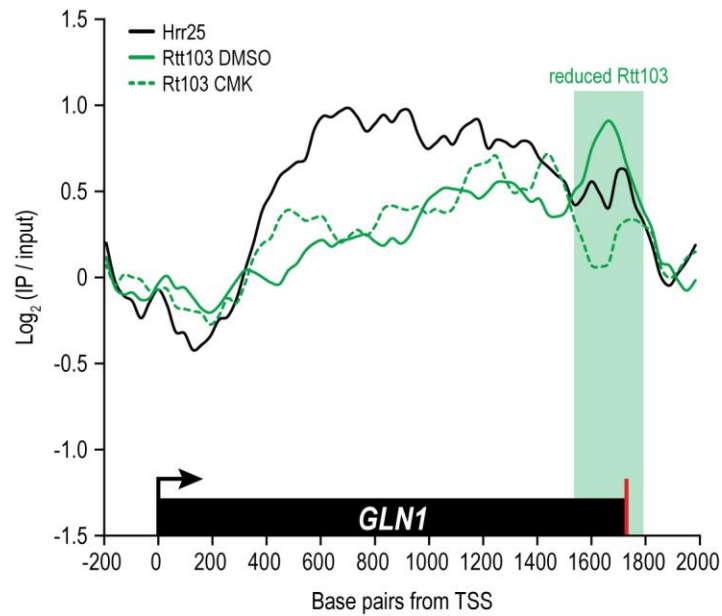

**Supplementary Figure 10 | Dissection of pThr4 deposition and Rtt103 recruitment.**

Chromatin immunoprecipitation was performed with antibodies targeting Hrr25 (HA), pThr4 (1G7), or Rtt103 (TAP) in *hrr25is* strains treated with either DMSO (solid) or CMK (dotted). Shown are representative levels at the protein coding gene *Gln1* (arrow is TSS and red bar is CPS). Hrr25 (black) occupancy is generally uniform across the gene. pThr4 (orange) levels begin to decrease ~600bp before the CPS upon *hrr25is* inhibition. Rtt103 (green) is subsequently depleted about 100bp from the CPS.



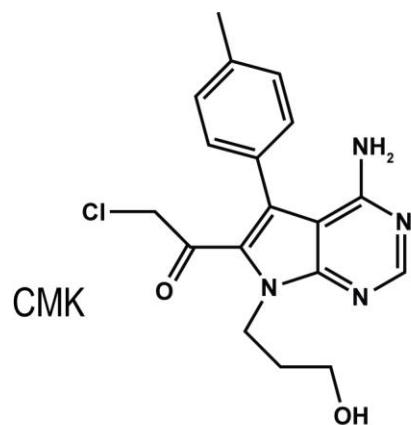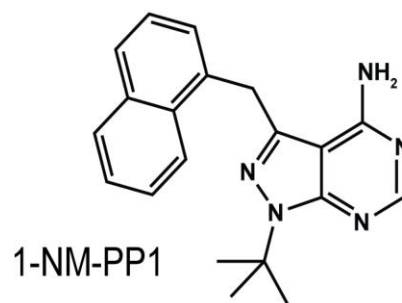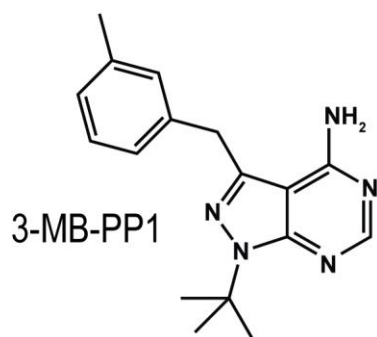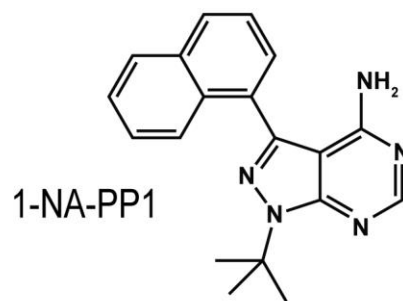

Supplementary Figure 11 | Chemical structures of compounds used.

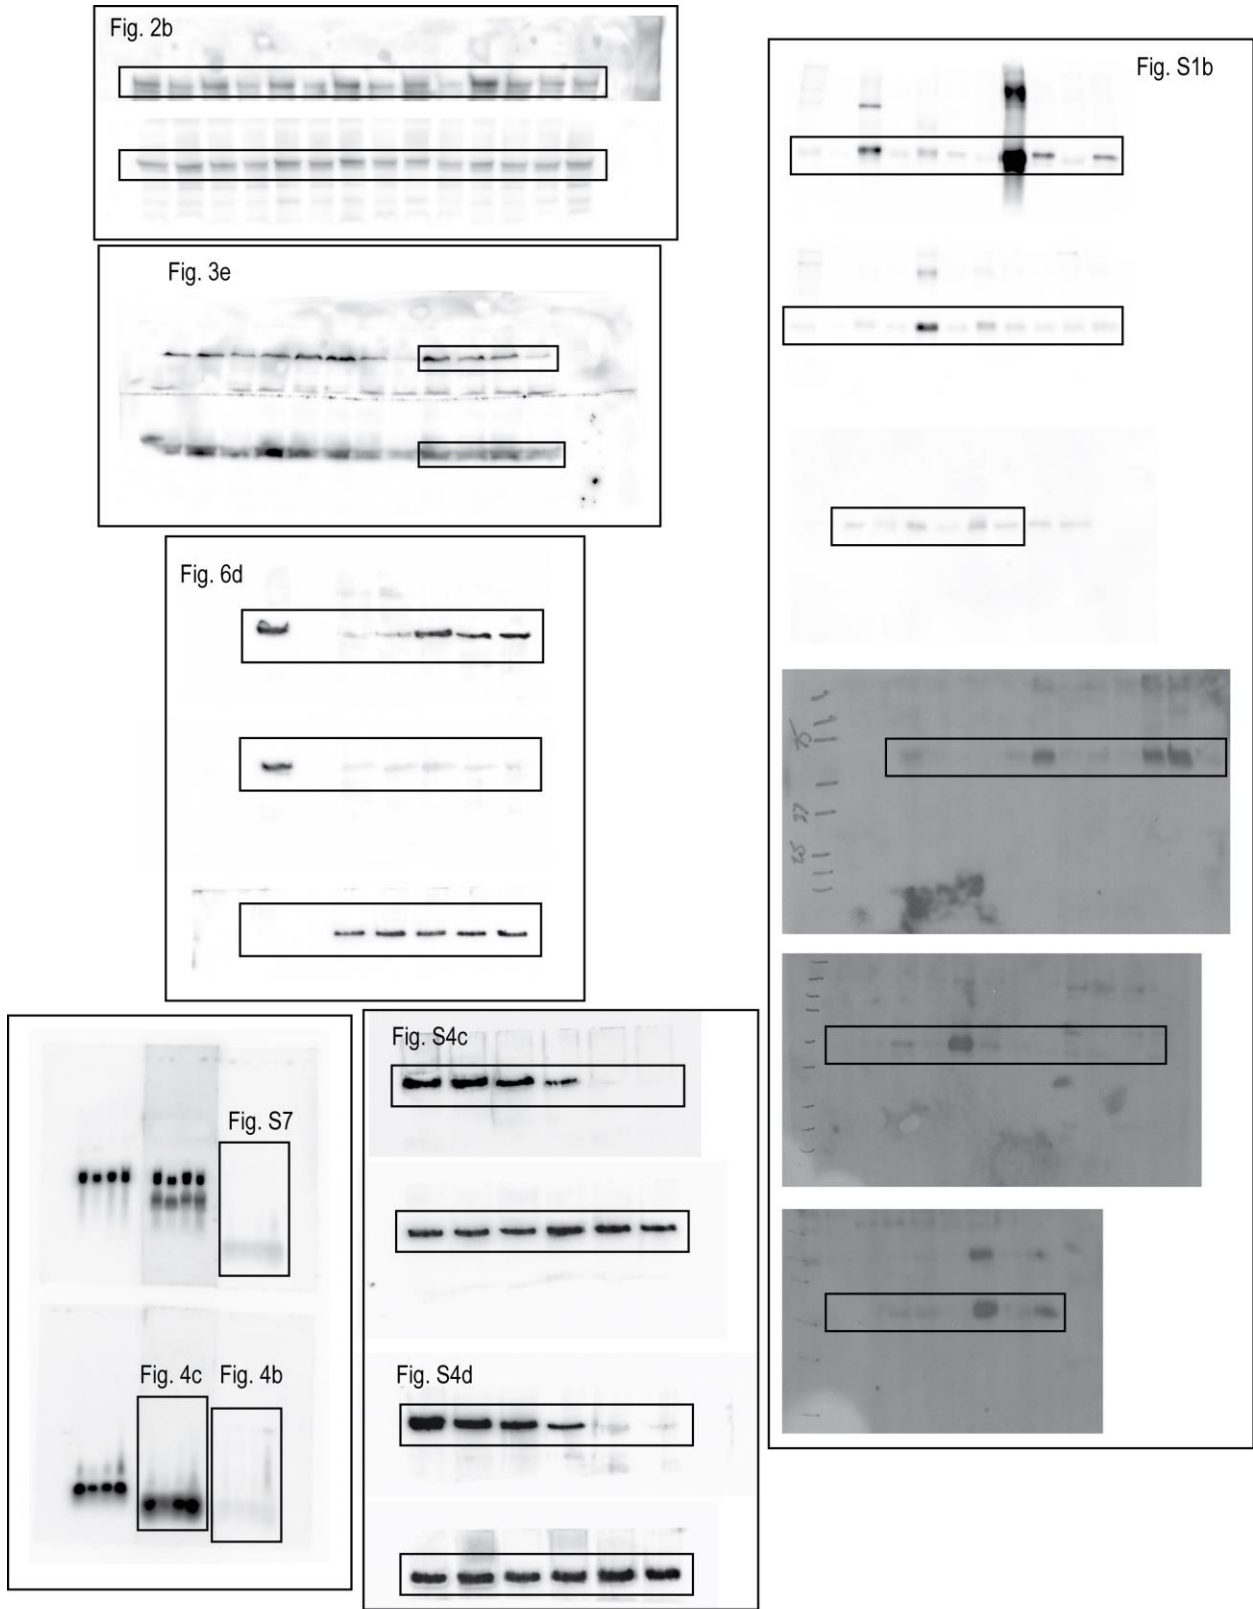

Supplementary Figure 12 | Raw, uncropped blots.

## References

- 1 Nemeč, C. M. *et al.* Different phosphoisoforms of RNA polymerase II engage the Rtt103 termination factor in a structurally analogous manner. *Proc Natl Acad Sci U S A* **114**, E3944-E3953, (2017).
- 2 Tomson, B. N. *et al.* Effects of the Paf1 complex and histone modifications on snoRNA 3'-end formation reveal broad and locus-specific regulation. *Mol. Cell. Biol.* **33**, 170-182, (2013).
- 3 Schaugency, P., Merran, J. & Corden, J. L. Genome-wide mapping of yeast RNA polymerase II termination. *PLoS Genet.* **10**, e1004632, (2014).
- 4 Fox, M. J., Gao, H., Smith-Kinnaman, W. R., Liu, Y. & Mosley, A. L. The exosome component Rrp6 is required for RNA polymerase II termination at specific targets of the Nrd1-Nab3 pathway. *PLoS Genet.* **11**, e1004999, (2015).
- 5 Harlen, K. M. *et al.* Comprehensive RNA Polymerase II Interactomes Reveal Distinct and Varied Roles for Each Phospho-CTD Residue. *Cell Rep* **15**, 2147-2158, (2016).
