# Supplementary material
Source: PubMed Central journal article supplement (PMC6339578)
Supplement: NIHMS1512140-supplement-2.pdf [file NIHMS1512140-supplement-2.pdf]

## Reporting Summary

Nature Research wishes to improve the reproducibility of the work that we publish. This form provides structure for consistency and transparency in reporting. For further information on Nature Research policies, see [Authors & Referees](#) and the [Editorial Policy Checklist](#).

### Statistical parameters

When statistical analyses are reported, confirm that the following items are present in the relevant location (e.g. figure legend, table legend, main text, or Methods section).

n/a | Confirmed

- The exact sample size ( $n$ ) for each experimental group/condition, given as a discrete number and unit of measurement
- An indication of whether measurements were taken from distinct samples or whether the same sample was measured repeatedly
- The statistical test(s) used AND whether they are one- or two-sided  
*Only common tests should be described solely by name; describe more complex techniques in the Methods section.*
- A description of all covariates tested
- A description of any assumptions or corrections, such as tests of normality and adjustment for multiple comparisons
- A full description of the statistics including central tendency (e.g. means) or other basic estimates (e.g. regression coefficient) AND variation (e.g. standard deviation) or associated estimates of uncertainty (e.g. confidence intervals)
- For null hypothesis testing, the test statistic (e.g.  $F$ ,  $t$ ,  $r$ ) with confidence intervals, effect sizes, degrees of freedom and  $P$  value noted  
*Give  $P$  values as exact values whenever suitable.*
- For Bayesian analysis, information on the choice of priors and Markov chain Monte Carlo settings
- For hierarchical and complex designs, identification of the appropriate level for tests and full reporting of outcomes
- Estimates of effect sizes (e.g. Cohen's  $d$ , Pearson's  $r$ ), indicating how they were calculated
- Clearly defined error bars  
*State explicitly what error bars represent (e.g. SD, SE, CI)*

*Our web collection on [statistics for biologists](#) may be useful.*

### Software and code

Policy information about [availability of computer code](#)

Data collection

Axon GenePix 4000B array scanner and GenePix Pro (v6.0) was used to scan microarrays. NimbleScan (v2.5) was used to extract microarray data for ChIP experiments. A Typhoon FLA 7000 scanned phosphorimage screens of Northern Blots. ImageQuant LAS 4000 was used to scan Western Blots.

Data analysis

Data in this manuscript were analyzed with ClustalW, MEGA6 (v10.0.5), Hypertree (v1.2.2), PyMol (v1.8.2), Autodock (v4.2.6), STAR (v2.5.1a), HTSeq (v0.6.1), DESeq (1.32.0), DeepTools (2.4.0), R (v3.3.0), ImageJ (v1.50e), and MultiExperiment Viewer (v4.8.1). Custom R scripts (previously reported in Tietjen et al. NSMB. 2010) are available upon request.

For manuscripts utilizing custom algorithms or software that are central to the research but not yet described in published literature, software must be made available to editors/reviewers upon request. We strongly encourage code deposition in a community repository (e.g. GitHub). See the Nature Research [guidelines for submitting code & software](#) for further information.

## Data

Policy information about [availability of data](#)

All manuscripts must include a [data availability statement](#). This statement should provide the following information, where applicable:

- Accession codes, unique identifiers, or web links for publicly available datasets
- A list of figures that have associated raw data
- A description of any restrictions on data availability

ChIP and RNA seq data are available with the following accession number: GSE107166

## Field-specific reporting

Please select the best fit for your research. If you are not sure, read the appropriate sections before making your selection.

Life sciences  Behavioural & social sciences  Ecological, evolutionary & environmental sciences

For a reference copy of the document with all sections, see [nature.com/authors/policies/ReportingSummary-flat.pdf](https://www.nature.com/authors/policies/ReportingSummary-flat.pdf)

## Life sciences study design

All studies must disclose on these points even when the disclosure is negative.

|                 |                                                                                                                                                                                                                                         |
|-----------------|-----------------------------------------------------------------------------------------------------------------------------------------------------------------------------------------------------------------------------------------|
| Sample size     | No statistical methods were used to predefine sample size. ENCODE guidelines were used for ChIP and RNA-seq experiments. Western blots and Northern blots were performed in biological triplicates according to standards in the field. |
| Data exclusions | No data were excluded                                                                                                                                                                                                                   |
| Replication     | All experiments were reliably repeated in independent replicates, as indicated in the figure legends. The Pearson correlation between biological ChIP and RNA-seq replicates were greater than 0.8.                                     |
| Randomization   | The order of addition of kinase inhibitor to each sample was randomized both for RNA-seq, ChIP, and Western blot experiments.                                                                                                           |
| Blinding        | No blinding applied to these experiments. No animal or human research participants were utilized. All samples were processed in parallel.                                                                                               |

## Reporting for specific materials, systems and methods

### Materials & experimental systems

| n/a                                 | Involved in the study                                           |
|-------------------------------------|-----------------------------------------------------------------|
| <input checked="" type="checkbox"/> | <input type="checkbox"/> Unique biological materials            |
| <input type="checkbox"/>            | <input checked="" type="checkbox"/> Antibodies                  |
| <input checked="" type="checkbox"/> | <input type="checkbox"/> Eukaryotic cell lines                  |
| <input checked="" type="checkbox"/> | <input type="checkbox"/> Palaeontology                          |
| <input type="checkbox"/>            | <input checked="" type="checkbox"/> Animals and other organisms |
| <input checked="" type="checkbox"/> | <input type="checkbox"/> Human research participants            |

### Methods

| n/a                                 | Involved in the study                           |
|-------------------------------------|-------------------------------------------------|
| <input checked="" type="checkbox"/> | <input type="checkbox"/> ChIP-seq               |
| <input checked="" type="checkbox"/> | <input type="checkbox"/> Flow cytometry         |
| <input checked="" type="checkbox"/> | <input type="checkbox"/> MRI-based neuroimaging |

## Antibodies

Antibodies used

anti-pThr4: 1G7 and 6D7, provided by Dirk Eick, used at 1/1000 dilution for Western blots and 1/100 for ChIP  
 anti-Rpb3: 1Y26, Biolegend, formerly Neoclone, used at 1/1000 for Western blots, 3/1000 for ChIP  
 anti-HA: ab9110, Abcam, used at 1/1000 for ChIP  
 anti-TAP: CAB1001, ThermoFisher, used at 1/1000 for ChIP

Validation

1G7 and 6D7 were validated in Hintermair et al. EMBO J. 2012 using ELISAs. anti-Rpb3 was originally validated by Svetlov et al. JBC. 1998, and is now commercially available from BioLegend.  
 anti-HA (abcam ab9110) has been validated by IHC, ChIP, ELISA, Co-IPs, and other experiments, and extensively used in over 380 publications. We observed no cross reactivity with any other protein when extract was probed via Western blot.  
 The anti-TAP antibody (Thermo CAB1001) has been validated by ChIP, Co-IPs, and other experiments, and extensively used in over 70 publications. We observed no cross reactivity with any other protein when extract was probed via Western blot.

## Animals and other organisms

---

Policy information about [studies involving animals](#); [ARRIVE guidelines](#) recommended for reporting animal research

Laboratory animals

No animals were used in this study

Wild animals

No wild animals were used in this study.

Field-collected samples

No samples were collected from the field.
